# Supplementary material for: A Comprehensive Study on the Electrostatic Properties of Tubulin-Tubulin Complexes in Microtubules
Source: MDPI journal article supplement (doi:10.3390/cells12020238), 2023-01-05
Supplement: s1 [file s1]

# Electrostatic interactions play essential roles in tubulin-tubulin polymerization of microtubules

*Wenhan Guo<sup>1</sup>, Tolulope Ale<sup>1</sup>, Shengjie Sun<sup>1</sup>, Jason E Sanchez<sup>1</sup>, Lin*

*Li<sup>1,2\*</sup>*

<sup>1</sup> Computational Science Program, University of Texas at El Paso, El Paso, TX

<sup>2</sup> Department of Physics, University of Texas at El Paso, El Paso, TX

\* **Correspondence:** Email: lli5@utep.edu.

Movies:

Movie1: Simulation of  $\alpha/\alpha$  tubulin complex (10ns)

Movie2: Simulation of  $\beta/\beta$  tubulin complex (10ns)

Movie3: Simulation of  $\alpha/\beta$  tubulin complex (10ns)

Movie4: Simulation of  $\beta/\alpha$  tubulin complex (10ns)
